# 1 Genome-wide signatures of geographic expansion and breeding 2 process in soybean

3 Ying-hui Li<sup>1,†</sup>, Chao Qin<sup>1, †</sup>, Li Wang<sup>2, †</sup>, Chengzhi Jiao<sup>3, 4, †</sup>, Huilong Hong<sup>1</sup>, Yu Tian<sup>1</sup>, Yanfei Li<sup>1</sup>,  
4 Guangnan Xing<sup>5</sup>, Jun Wang<sup>6</sup>, Yongzhe Gu<sup>1</sup>, Xingpeng Gao<sup>3</sup>, Delin Li<sup>1</sup>, Hongyu Li<sup>1</sup>, Zhangxiong Liu<sup>1</sup>,  
5 Xin Jing<sup>3</sup>, Beibei Feng<sup>5</sup>, Tao Zhao<sup>1</sup>, Rongxia Guan<sup>1</sup>, Yong Guo<sup>1</sup>, Jun Liu<sup>1</sup>, Zhe Yan<sup>1</sup>, Lijuan Zhang<sup>1</sup>,  
6 Tianli Ge<sup>1</sup>, Xiangkong Li<sup>3</sup>, Xiaobo Wang<sup>7</sup>, Hongmei Qiu<sup>8</sup>, Wanhai Zhang<sup>9</sup>, Xiaoyan Luan<sup>10</sup>, Yingpeng  
7 Han<sup>11</sup>, Dezhi Han<sup>12</sup>, Ruzhen Chang<sup>1</sup>, Yalong Guo<sup>13</sup>, Jochen C. Reif<sup>14</sup>, Scott A. Jackson<sup>15,\*</sup>, Bin Liu<sup>1,\*</sup>,  
8 Shilin Tian<sup>3, 16,\*</sup>, Li-juan Qiu<sup>1,\*</sup>

9

10

11 <sup>1</sup>The National Key Facility for Crop Gene Resources and Genetic Improvement (NFCRI)/Key Laboratory of Crop Gene  
12 Resource and Germplasm Enhancement (MOA)/Key Laboratory of Soybean Biology (Beijing) (MOA), Institute of Crop Science,  
13 Chinese Academy of Agricultural Sciences, Beijing, P. R. China

14 <sup>2</sup>Shenzhen Branch Guangdong Laboratory for Lingnan Modern Agriculture/Genome Analysis Laboratory of the Ministry of  
15 Agriculture/Agricultural Genomics Institute at Shenzhen, Chinese Academy of Agricultural Sciences, Shenzhen, P. R. China

16 <sup>3</sup>Novogene Bioinformatics Institute, Beijing, P. R. China

17 <sup>4</sup>State Key Laboratory of Crop Genetics and Germplasm Enhancement/Cytogenetics Institute, Nanjing Agricultural University,  
18 Nanjing, Jiangsu, P. R. China

19 <sup>5</sup>Soybean Research Institute/MOA National Center for Soybean Improvement/MOA Key Laboratory for Biology and Genetic  
20 Improvement of Soybean (General)/State Key Laboratory for Crop Genetics and Germplasm Enhancement, Nanjing Agricultural  
21 University, Nanjing, Jiangsu, P. R. China

22 <sup>6</sup>College of Agriculture, Yangtze University, Jingzhou, Hubei, P. R. China

23 <sup>7</sup>School of Agronomy, Anhui Agricultural University, Hefei, Anhui, P. R. China

24 <sup>8</sup>Jilin Academy of Agricultural Sciences, Changchun, Jilin, P. R. China

25 <sup>9</sup>Hulun Buir Institution of Agricultural Sciences, Zhalantun, Inner Mongolia, P. R. China

26 <sup>10</sup>Soybean Research Institute, Heilongjiang Academy of Agricultural Sciences, Harbin, Heilongjiang, P. R. China

27 <sup>11</sup>Key Laboratory of Soybean Biology in Chinese Ministry of Education (key Laboratory of Soybean Biology and  
28 Breeding/Genetics of Chinese Agriculture Ministry), Northeast Agricultural University, Harbin, Heilongjiang, P. R. China

29 <sup>12</sup>Heihe Branch of Heilongjiang Academy of Agricultural Sciences, Heihe, Heilongjiang, P. R. China

30 <sup>13</sup>State Key Laboratory of Systematic and Evolutionary Botany, Institute of Botany, Chinese Academy of Sciences, Beijing, P. R.  
31 China

32 <sup>14</sup>Department of Breeding Research, Leibniz Institute of Plant Genetics and Crop Plant Research (IPK), Gatersleben, Germany

33 <sup>15</sup>Center for Applied Genetic Technologies, University of Georgia, Athens, GA 30602, USA

34 <sup>16</sup>Department of Ecology/Tibetan Centre for Ecology and Conservation at WHU-TU/Hubei Key Laboratory of Cell  
35 Homeostasis/College of Life Sciences, Wuhan University, Wuhan, Hubei, P. R. China

36 <sup>†</sup> These authors contributed equally to this work.

37 Correspondence and requests for materials should be addressed to Li-juan Qiu ([qiulijuan@caas.cn](mailto:qiulijuan@caas.cn)), Shilin Tian  
38 ([tianshilin@novogene.com](mailto:tianshilin@novogene.com)), Bin Liu ([liubin05@caas.cn](mailto:liubin05@caas.cn)) or Scott A. Jackson ([sjackson@uga.edu](mailto:sjackson@uga.edu))

39 **Abstract**

40 The clarification of genomic signatures left during evolutionary histories of crops is crucial  
41 for breeding varieties adapting to changing climate. Soybean, a leguminous crop, provides  
42 both plant oil and protein. Here, we analyzed genome sequences of 2,214 soybeans and  
43 proposed its evolutionary route, which includes four geographic paths, expansion of annual  
44 wild soybean (*Glycine soja* Sieb. & Zucc.) from Southern China, domestication in Central  
45 China, expansion of landrace (*G. max* (L.) Merr.), and local breeding. We observed that local  
46 adaptation of the wild and cultivated soybeans was largely independent, and that genetic  
47 introgression was mostly derived from sympatric rather than allopatric wild populations  
48 during the range expansion of soybean landraces. Range expansion and breeding processes  
49 were accompanied with positive selection of flowering-time genes including *GmSPA3c* as  
50 validated by knock-out mutants. Our study shed lights on the evolutionary history of soybean  
51 and provides valuable genetic resources for future breeding.

52

53 Key words: Soybean, Adaptation, Introgression, Flowering time, Breeding

54

55 Teaser: The expansion and selection history of soybean

56 **Introduction**

57 Plants evolution is an expansive process that includes early domestication, habitat expansion  
58 and subsequent genetic improvement (1), reflecting the impact of artificial and natural  
59 selection on gene diversity. During evolution, genes favoring intensive cultivation, high  
60 productivity and quality were selected and resulted in the appearance of landraces and  
61 subsequent improved cultivars. The spread of landraces and improved cultivars led to  
62 substantial increases in range of adaptation and productivity. During habitat expansion, in  
63 contrast, gene variants accumulate, which allowed adaptation to new environmental  
64 conditions. Therefore, a retrospective view of changes in genetic diversity can be used to  
65 identify genes that are crucial, for example, to the future adaptation of crops to changing  
66 climate.

67 Soybean is a remarkable crop with rich genomic resources (2), a worldwide leading  
68 source of protein and oils, including edible oil, human food, livestock forage, and biodiesel.  
69 Cultivated soybean (*Glycine max* (L.) Merr.) was proposed to have been domesticated in  
70 China about 5,000 years ago from its annual wild relative (*Glycine soja* Sieb. & Zucc.)(3).  
71 After domestication, local landraces spread throughout East Asia, sympatric, i.e. sharing the  
72 habitat, with their wild relatives. The success of modern breeding led to the replacement of  
73 local landraces by high-yielding and quality cultivars in the soybean production. Soybean is  
74 an excellent system to study how demography and selection altered crop genomes. The  
75 molecular footprint left during domestication and genetic improvement had been clarified in  
76 several studies (2, 4-6), however, little is known the landscape of genomic signatures  
77 underlying the expansion of the wild soybean and landrace respectively, and if the gene flow  
78 between sympatric wild soybean and landraces facilitated the local adaptation, the same as  
79 maize, sorghum etc. (7, 8).

80 With newly sequenced 1,674 soybean genomes and 540 previously released genomes (4,  
81 9) covering its geographic distribution and the diversity of cultivars, we clarified the  
82 spreading routes of soybean, examined the prevalence of introgression from the wild to  
83 cultivated populations, detected signatures of selection in different evolutionary processes and  
84 validated the function of one representative flowering time gene involving the expansion of  
85 cultivated soybean with the CRISPR/Cas9 knock-out experiments.

## 86 **Results**

### 87 **A genomic variation map of soybean**

88 The subgenus *Soja* includes domesticated *G. max* and its wild antecedent, *G. soja*. The *G.*  
89 *max* species includes landraces and improved cultivars. To analyze genetic variation, an  
90 extensive and diverse set of soybean genomes was studied, including 1,993 *G. max* (1,131  
91 landraces and 862 improved cultivars), 218 *G. soja*, two perennial *G. tomentella* and one  
92 perennial *G. tabacine* (**Figs. 1A, 1B and table S1**). Of these, 1,674 genomes were newly  
93 sequenced and 540 were previously published(4, 9). *G. soja* accessions and *G. max* landraces  
94 were collected from their native geographic range, i.e. East Asia. Improved cultivars were  
95 sampled globally, mainly from primary soybean producing countries such as the United States  
96 of America, Japan, Korea, and China (**table S1**). A total of 1,690 out of the 1,993 cultivated  
97 soybeans (84.8%), were selected from the Chinese primary and applied core collections based  
98 on 14 agronomic traits and sequences of 60 single copy loci, representing the broad genetic  
99 diversity of the 23,587 cultivated soybeans from the Chinese National Soybean Gene Bank(10,  
100 11).

101 A total of 16.41 Tb (Tera bases) high-quality genome sequences of 2,214 accessions were  
102 mapped to the soybean reference genome(12) (**table S1**). We obtained 8,785,134 high-  
103 confidence biallelic SNPs (Supplementary Methods), and subsequently annotated 1,259,917  
104 SNPs (14.3%) located within 53,720 protein-coding genes (95.85% of the total genes) (**fig. S1,**  
105 **2 and table S2**). The validation ratio of 98.3% for 114 accessions randomly selected from all  
106 2,214 samples using the genotyping by target sequencing method, indicated that SNP calling  
107 in this study had a low miscall rate (**table S3**). Not surprisingly, SNP density was significantly  
108 higher in promoter regions than in coding regions ( $p \cong 0$ ; **fig. S3**). A total of 170,193 missense  
109 and 5,214 stop-gain/loss SNPs were observed that caused amino acid changes, premature  
110 stops or elongated transcripts, respectively, leading to potential changes in 40,742 protein  
111 sequences (72.70% of the total) (**table S4**).

112

### 113 **Wild and cultivated soybeans showed an analogous population differentiation according** 114 **to their geographic origin**

115 To further elucidate the genetic structure in soybeans, we selected 1,721,062 SNPs with weak

116 linkage disequilibrium (LD;  $r^2 < 0.8$ ) amongst each other(13). Three methods were used to  
117 infer population structure including the neighbor-joining (NJ) tree, principal components  
118 (PCA)(14) and Bayesian clustering(15). The results from each were concordant (**Fig. 1c and**  
119 **fig. S4-5**) and showed that the primary genetic differentiation was between *G. max* and its  
120 progenitor *G. soja*, indicating that soybean underwent a single domestication event consistent  
121 with previous studies(4, 16). We subsequently found that 204 *G. soja* accessions (93.6%)  
122 were clearly distinguished into three sub-populations corresponding to three different  
123 geographical regions: (1) the Chinese Northern region plus Japan, Korean peninsula, and  
124 Russian Far East region (termed as W\_NR, n=89, “W” indicated “wild”); (2) Chinese Central  
125 region surrounding the mid-down stream of the Yellow River valley (W\_CR, n=73); and (3)  
126 the Chinese Southern region (W\_SR, n=42) (**fig. S4A, 5B, and 6A**). Genotypes of the W\_SR  
127 formed the first divergent clade in the maximum likelihood rooted tree, indicating that the  
128 wild soybean likely spread northward from the Chinese Southern region (**Fig. 1C**). Similarly,  
129 1,632 *G. max* accessions (81.9%) were distinguished into four different geographical regions,  
130 i.e., C\_NR (n=403, “C” indicated “cultivated”), C\_CR (n=278), C\_SR (n=711), and the  
131 America (C\_Am, n=240) (**fig. S4C, 5C, 6B and 7**), demonstrating an analogous population  
132 differentiation with its sympatric wild relatives. To gain insights into the origin locations of  
133 the cultivated soybean, we constructed a neighbor-joining tree of all pooled sub-populations  
134 with perennial species as outgroup (**Fig. 1D**). It revealed that the wild subpopulation from the  
135 central region (W\_CR) is phylogenetically closest to the cultivated clade and the landraces  
136 from the central region (L\_CR) is the first subclade diverged from the wild subpopulations.  
137 Meanwhile, the estimate of effective population sizes ( $N_e$ ) in the three sub-populations of  
138 cultivated soybeans revealed that C\_SR and C\_NR showed stronger bottlenecks than C\_CR  
139 (**fig. S8**), suggesting that the cultivated populations were expanded from C\_CR to C\_SR and  
140 C\_NR. Furthermore, we detected gene flow from the Central to Northern landrace  
141 populations and from the Central to the Southern improved cultivars (**Fig. 1E**). Taken together,  
142 these results implied that the middle reaches of the Yellow River as the domestication center  
143 of soybeans.

144

145 **Introgressions facilitated local adaptation of landraces**

146 Soybean was initially constrained and adapted to a narrow and specific geographic range(3),  
147 but subsequently underwent a massive spread after its domestication in Central China. One  
148 questions is whether gene flow from local wild populations facilitated its adaptation and  
149 spread, as reported for other crop species(7, 17). In order to answer this question, we first  
150 inferred the gene flow between inter-/intra- sub-populations of *G. soja* and *G. max* at the  
151 genome-wide level using TreeMix(18). Noticeably, we observed directional gene flow from  
152 local wild to landrace populations among all three subpopulations (**Fig. 1E and fig. S9**). Next,  
153 we calculated  $f_d$  values in 10 kb non-overlapping sliding windows to define the genomic  
154 regions of gene flow. We found that the  $f_d$  values were significantly higher for comparisons  
155 that involved two sympatric wild and landrace populations than that those involving allopatric  
156 populations ( $p < 2.97e-10$ ,  $t$  test) (**Fig. 2**). This was true except for introgression levels from  
157 the Southern wild to the Southern landrace populations which was not different from the  
158 Northern wild to the Southern landrace populations (**Fig. 2**;  $p = 0.1$ ,  $t$  test), which might  
159 reflect the genetic exchange between the wild populations during the last glacier  
160 maximum(19). These data indicate that when soybean landraces migrated to the Southern and  
161 Northern regions, the gene flow from local wild populations likely accelerated local  
162 adaptation.

163 We had a closer look on windows including the top 5%  $f_d$  values and functionally  
164 annotated genes associated with seed quality, flowering time, and biotic resistance (**table S5**;  
165 **fig. S10-12**). A mega-scale introgression was identified in both the Central and Southern  
166 China at around 20-30 Mb on chromosome 6, covering a key flowering time gene *E1* (**fig.**  
167 **S10 and 12**). By further examining the outlier windows with the top 5%  $f_d$  values, we found  
168 introgression regions that were in common among the three geographic regions (**fig. S13**).  
169 The super exact test(20) revealed that the sharing of introgression regions among populations  
170 was significantly enriched ( $p < 0.0001$ ) at any combination (**fig. S13**), indicating that variation  
171 at key common loci was important for its spread both south and north.

172

### 173 **Genomic signals during the spreading of soybean**

174 Based on the phylogenetic, population structure and demographic analyses, we propose an  
175 evolutionary route of the wild and cultivated soybeans that includes four geographic paths

176 **(Fig. 3A)**. The first path corresponds to the expansion of the wild soybean from the Southern  
177 to the Northern China. The second represents the domestication process in Central China  
178 while path three is the expansion of the landrace populations from the Central region to the  
179 north and south and the fourth reflects the improvement process. We then identified signatures  
180 of selection for each of the four paths with three statistics:  $\log_2(\theta/\pi)$  ratio(21), Population  
181 Branch Statistics (PBS)(22, 23), and cross-population composite likelihood ratio (XP-  
182 CLR)(24). Considering that the low overlap of selected molecular markers could have  
183 resulted from different signatures of population variations in the three methods(25, 26), we  
184 took the windows with support from at least one statistic as the candidates **(Fig. 3B and fig.**  
185 **S14-20)**.

186 We identified a total of 2,438 and 4,877 genes exhibiting strong genetic differentiation  
187 during the expansion of wild soybeans (W\_SR vs. W\_CR, W\_SR vs. W\_NR) and landraces  
188 (L\_CR vs. L\_NR and L\_CR vs. L\_SR) **(Fig. 3B, fig. S14-27 and table S6)**, respectively. As  
189 the wild and landrace populations have a similar geographic range, we further asked whether  
190 both populations underwent parallel adaptation to similar environments by inspecting the  
191 overlap of selected genomic regions. The genomic scan revealed that 72.94 Mb and 61.35 Mb  
192 of the genome was selected in landraces and wild relatives, respectively. Of this, 6.96 Mb was  
193 shared, which was not significantly over-represented ( $p > 0.05$ , hypergeometric test).  
194 Similarly, the overlap of selected genes during the expansion of the *G. soja* and *G. max* was  
195 significantly lower than expected ( $p > 0.05$ , hypergeometric test) by chance. Taken together,  
196 this suggests that *G. soja* and *G. max* adapted independently to the same/similar local  
197 environments. We did not find any previously characterized genes with signals of selection in  
198 path one, likely due to the limited studies in *G. soja*. In path three, a cloned flowering time  
199 gene *E2*(27), a homologue of GIGANTEA (GI) in *Arabidopsis*, was shown to be under  
200 selection when landraces dispersed from the Central to the Southern and Northern regions,  
201 respectively; whereas another flowering time gene *GmFT2a*, homologue of *Flowering Locus*  
202 *T* (*FT*) in *Arabidopsis* was detected as an outlier when the landraces expanded from the  
203 Central to the Southern region(**table S6**). Analyses of the causal variant in *E2*  
204 (Chr10:45310798) revealed that the early flowering allele (Chr10:45310798\_T) was nearly  
205 fixed in the C\_NR, including L\_NR and I\_NR. This indicates that flowering time genes are

206 essential to the local adaptation during the geographic expansion of landraces.

207 We then focused on the domestication (W\_CR vs. L\_CR) and improvement processes  
208 (L\_CR vs. I\_CR; L\_SR vs. I\_SR; L\_NR vs. I\_NR), paths two and four (**fig. S16, 18-20 and**  
209 **table S6**). During domestication, in order to pursue the rapid and uniform seed germination as  
210 well as a safe and edible soybean seeds without hazardous allergens(28), the early farmers  
211 focused on phenotypic changes that led to the loss of seed hardness and the loss of seed  
212 bloom. In total, 2,496 genes were detected with signatures of selection during the process of  
213 domestication. Among those genes, we found several genes responsible for key phenotypic  
214 changes during domestication, such as the flowering time genes *E4* and *GmFT5a*. In addition  
215 to these candidate genes identified with a stringent cutoff (above the 99% quantile), other  
216 candidate genes appeared when the cutoff was lowered to the top 5% outliers, including a  
217 seed blooming *Boom1* (*BI*), seed hardness *GmHs1\_1*, and seed dormancy *G* gene (28-30).  
218 The human-favored causal alleles of these genes were strongly selected in the landraces (**fig.**  
219 **S21**).

220 As breeders mostly utilized local landraces to develop improved cultivars suitable for  
221 local environments, we tested the genes under selection in three independent improvement  
222 processes. We found 2,529, 2,785, and 2,388 candidate genes in the Northern, Central, and  
223 Southern regions, respectively. Of these, 86.9% (5,921 genes) were region-specific, which  
224 may be attributed to the distinct improvement intention and the different environmental  
225 conditions in the three geographic regions. For example, three previously characterized  
226 flowering time genes exhibited selection signals during the improvement process. Among the  
227 three flowering time genes, *E1* was detected in Southern region, *E2* in Southern and Northern  
228 regions and *GmFT5a* in Central region.

229 To complement the three previous statistics of selection, we also identified stepwise and  
230 directional increase or decrease of allele frequencies through integrating combinations of the  
231 four paths incorporating domestication, expansion, and improvement in the three regions (**Fig.**  
232 **3C**). A total of 543, 1,444 and 3,487 genes exhibited consecutive dynamic changes of allele  
233 frequencies with respect to evolutionary stages in the Southern, Northern, and Central regions,  
234 respectively. Two hundred genes were shared, suggesting their significance in the broad sense  
235 of soybean domestication. Interestingly, three previously cloned flowering time genes



236 (*GmFT2b*, *GmFT4/E10* and *GmGBP1*) showed consecutive increases in allele frequencies.  
237 These three genes all had exhibited selection during the expansion of wild soybeans from the  
238 Southern to Central regions and domestication in the Central region (**fig. S22**). Subsequently,  
239 *GmFT2b* and *GmFT4* were utilized by the breeders during improvement in the Central  
240 regions, and *GmGBP1* and *GmFT2b* were selected during range expansion of landraces from  
241 the Central to the Northern and Southern region, respectively and then utilized in local  
242 improvements. In conclusion, those findings represent a small and stepwise, directional and  
243 consecutive shift of allele frequencies during soybean domestication, complementing the  
244 pronounced shift of allele frequencies detected by the previous statistics and providing  
245 additional genetic insights into the process of domestication and resources for further  
246 improvement.

247

#### 248 **Validation of flowering time gene *GmSPA3c* involving in soybean expansion**

249 As flowering time is a key agricultural trait for its contribution to adaptation, crop yield and  
250 quality, it has been the long-term target of selection during breeding research (31, 32).  
251 Although several flowering time genes (such as *E1-E4*, *GmFT1a*, *GmFT2a*, *GmFT2b*,  
252 *GmFT4*, *GmFT5a*, *J*, and *GmPRR3b/Tof12*) have been characterized in soybean (9, 27, 33-41),  
253 the underlying molecular mechanisms in soybean evolution remain unclear. Among the  
254 selected genes during domestication, improvement, and expansion of soybean, we observed  
255 seven cloned flowering time genes in soybean, including *E1*, *E2*, *E4*, *GmFT2a*, *GmFT2b*,  
256 *GmFT4* and *GmFT5a*.

257 We further found that four *FT* paralogous genes (*GmFT2a*, *GmFT2b*, *GmFT4* and  
258 *GmFT5a*) associated with photoperiod response were selected in different evolutionary paths.  
259 *GmFT5a* underwent selection during domestication and improvement, whereas *GmFT2a* was  
260 selected during landrace range expansion (**table S6**). *GmFT2b* and *GmFT4* underwent a  
261 consecutive allele frequency change from path one to four, suggesting its significance in the  
262 broad sense of domestication. Recently, the homozygous quadruple mutant with loss-of-  
263 function mutations in the four copies of MADS-box transcription factor *GmAPETALA1* genes  
264 (*AP1a-d*) was generated using CRISPR-Cas9 technology, which exhibited delayed flowering  
265 under short days in soybean (42). Our results indicated that *GmAP1c*, *1d* and *1b* were selected

266 during wild range expansion, landrace expansion, and genetic improvement, respectively. To  
267 summarize, the flowering time pathway played a significant role in the broad adaptation of  
268 soybean and the paralogs of flowering time genes were selected in different evolutionary  
269 paths, suggesting the specificity of the pathway in soybean.

270 Of the identified candidate genes, 203 were previously described as either regulators or  
271 homologs of flowering-time genes, which covered the primary components of the flowering  
272 time pathways (**table S6**). To establish correlations between these candidate flowering genes  
273 and the genetic regions controlling flowering time, we performed a genome-wide association  
274 study (GWAS) for flowering time with 1,993 cultivated soybean lines planted in Nanjing city  
275 (32.07°N, 118.78°E). Of the 35 candidate QTL regions with association signals ( $-\log_{10} p \geq 13$ ),  
276 a locus *qFT06-5* corresponded to the *E7* locus (**Fig. 4A, fig. S23, table S7**), one of 12 major  
277 flowering loci (43) and mapped in a 12.56 Mb genomic region (Chromosome 6: 31,490,622-  
278 44,050,041) flanked by two SSR markers Satt100 and Satt460 (44). In order to identify the  
279 candidate flowering time gene(s), we delineated a 271.8 kb region (chromosome 6:  
280 39,983,666-40,255,433) with  $r^2 \geq 0.8$  flanking the locus *qFT06-5*. This region was under  
281 selection during the expansion of landraces from the Central to Northern regions and  
282 improvement in the Central region (**fig. S24**). Five annotated genes were located within  
283 *qFT06-5*, including two homologous genes of *Suppressor of PHYA-105* (*SPA*)  
284 (*Glyma.06G241900* and *Glyma.06G242100*). *Glyma.06G241900* was an incomplete gene due  
285 to the deficiencies of the open reading frame, while *Glyma.06G242100* is one of the four co-  
286 orthologs of *Arabidopsis SPA3*, hereafter, *GmSPA3c* (**fig. S25**).

287 We detected 13 *GmSPA3c* haplotypes based on 13 missense mutations (referred to as  
288 Hap1 to Hap13). The haplotype diversity decreased from 13 in *G. soja* to 7 in landrace and 6  
289 in improved cultivars (**Fig. 4B**). Among them, Hap11 and Hap12 are the two predominant  
290 haplotypes within cultivated soybeans including the 24 accessions with released *G. max*  
291 genomes (2). Median-Joining network analysis suggested that Hap11 and Hap12 were  
292 independently selected during domestication, but Hap11 rather than Hap12 was preferentially  
293 selected during genetic improvement (**Fig. 4C**). We further evaluated the phenotypic effects  
294 of the two haplotypes and revealed that the cultivars carrying Hap11 flowered significantly

295 earlier than those carrying Hap12 (**Fig. 4D**). The geographical distribution of the accessions  
296 carrying Hap11 or Hap12 indicated that the landraces or cultivars carrying Hap11 were  
297 distributed all over China, while those carrying Hap12 were mainly distribute in central China.  
298 Together, the early flowering effect of Hap11 may contribute to a beneficial trait that was  
299 preferentially selected and expanded the adaptability of *G. max* to different regions.

300 We evaluated the function of *GmSPA3c* Hap11 by the CRISPR/Cas9 method (**fig. S25B**).  
301 We obtained multiple independent lines and selected two representative null mutants for  
302 phenotypic analyses. The results showed that loss-of-function of *GmSPA3c* conferred early  
303 flowering phenotype under long-day but not short-day conditions (**Figs. 5A and 5B**).  
304 Consistent with this, the flowering inhibitor *E1* and *GmFT4* were downregulated (**Fig. 5C**),  
305 while the flowering activator *GmFT5a* and *GmFT2a* was upregulated in the *Gmspa3c* mutants  
306 in a long-day photoperiod dependent manner (**Fig. 5C**), but their expressions did not change  
307 obviously under short-day conditions (**fig. S25C**). The observation that the *Gmspa3c* mutants  
308 flower earlier than the wild type TL1 (carrying Hap11) suggested that Hap11 is still a  
309 flowering repressor but with a weaker activity in comparison to Hap12.

310 To gain insight into how Hap12 is functionally different from Hap11, firstly, we  
311 compared the expression levels of *GmFT2a* and *GmFT5a* in accessions harboring either  
312 Hap11 or Hap12 (**fig. S25D**). The results showed that the expression levels of *GmFT2a* and  
313 *GmFT5a* were significantly higher in the Hap11 accessions than in the Hap12 accessions,  
314 indicating that Hap11 might be selected as a weaker flower inhibitor during soybean  
315 domestication and improvement. Besides, we performed correlation analysis between  
316 *GmSPA3c* (Hap11 and Hap12) and *GmFT5a* mRNA levels in calluses transformed with  
317 *35s:GmSPA3c* (Hap11 and Hap12) at ZT4. The results showed that expression levels of  
318 *GmFT2a* and *GmFT5a* were more effectively suppressed by Hap12 than Hap11(**fig. S25E**).  
319 Furthermore, we performed complementation experiment by genetic transformation of the  
320 *GmSPA3c-Hap12* CDS driven by its native promoter into TL1 (Hap11 background) (**Figs. 5D**),  
321 The results showed that the flowering time of complementation lines were significantly later  
322 than TL1, even under short-day conditions (**Fig. 5E**). The flowering inhibitor *E1* were  
323 upregulated, while the flowering activator *GmFT5a* and *GmFT2a* was downregulated in the  
324 complementation lines (**fig. S25F**). Those results that *GmSPA3c* is a flowering repressor and the

325 behavior of its loss-of-function mutant is reminiscent to that of the *e7* NIL lines (45), together  
326 with the fact that the *GmSPA3c* gene locates within the *E7* QTL site, suggested that *GmSPA3c*  
327 is a *bona fide* candidate for the long sought-after *E7* gene.

## 328 **Discussion**

329 Distinct from previous publications which majored on the studies of soybean domestication  
330 and genetic improvement related to artificial selection (2, 4-6), this study provides the first  
331 comprehensive analyses of the evolutionary history of soybean, including the dispersal of  
332 wild soybean, domestication site, range expansion of landraces and the subsequent  
333 improvement process, based on a dense and diverse sampling of the wild and cultivated  
334 samples. *G. soja*, the wild progenitor of cultivated soybean, has not undergone artificial  
335 bottlenecks and thus, is one valuable genetic source with ability conferring adaption to new  
336 environments (19). To improve the study and utilization of *G. soja*, we constructed the  
337 phylogenetic tree using the only two perennial species (*G. tabacina* and *G. tomentella*)  
338 discovered in East Asia (46) as root and deduced the phylogeographical expansion routes of  
339 wild soybeans, which maybe origin in south China and spread to central and north China.  
340 Suggested that even though its wild progenitor originated in the subtropical Asia, soybean was  
341 domesticated in the temperate region in China. We also provide genetic evidence to support  
342 that soybean was domesticated in Central China surrounding the middle and lower reaches of  
343 Yellow River (16, 47) from its wild progenitor, which originally spread from Southern China.  
344 Post domestication, landraces expanded northward and southward colonizing an expansive  
345 area of East Asia. Recurrent introgression from adapted sympatric wild soybeans might  
346 facilitate the local adaptation of landraces. The improved soybean was most likely developed  
347 from locally adapted landraces, indicating that soybean cultivars have recurrently ‘used’ local  
348 wild genetic diversity. Given the independent adaptation between the wild and cultivated  
349 soybean, the introduction of genetic resource of wild soybean from allopatric regions would  
350 likely be valuable to mitigate its adaptation to the changing climate.

351 Most previous studies of crops described selection signals during domestication and  
352 genetic improvement based on the broad sense of genomic changes (4, 48). Here we included  
353 geography to further refine the genetic footprint of breeding within specific regions. As  
354 soybean was constrained and adapted to a narrow and specific geographic range, we detected

355 the selection signals during domestication between the wild and landrace populations from the  
356 domestication site, and during improvement between sympatric landrace and improved lines,  
357 which minimize noise resulting from the complex genetic background of the contrast  
358 population. Additionally, the traditional methods are all based on the comparison of two  
359 different populations (21, 23, 24, 49). However, the domestication, expansion and  
360 improvement are consecutive evolutionary processes. So, we designed a method to detect  
361 stepwise and directional increase or decrease of allele frequencies across multiple  
362 evolutionary stages (50, 51), which provides insights into the evolutionary dynamics of  
363 soybean genomes under the combination of both natural and artificial selection. Given the  
364 importance of flowering time in the spread and adaptation of soybean, we evaluated candidate  
365 genes in the flowering time pathway. We used an integrated strategy by combining the search  
366 for genomic footprints of selection with association mapping to identify suitable candidate  
367 genes. The most important and laborious step was the validation of candidate genes by  
368 generating loss-of-function mutants by CRISPR/Cas9 technology and complementation  
369 experiment. This strategy is in particular suitable for functional variant encoded by single  
370 nucleotide polymorphisms. Extending our approach towards structural variation is  
371 challenging, but as a first important step an integrated graph-based genome for soybean using  
372 *de novo* assembled genomes of 29 genotypes has been published(2).

373 Our results highlight that the adaptation of flowering time was a continuous process. In  
374 particular, we verified the flowering time modulating functions of one selected gene,  
375 *GmSPA3c* as a flowering repressor, underwent weak but sustained selection during  
376 domestication, landrace expansion and improvement. Our GWAS mapping and functional  
377 verification further suggested that *GmSPA3c* is a candidate of long-sought flowering locus *E7*.  
378 *GmSPA3c* featured early flowering alleles or haplotypes of both genes were selected, which is  
379 consistent with a historic trend that novel varieties flowered earlier locally since the beginning  
380 of domestication (52). The shortening of the time from vegetative to reproductive growth may  
381 associate with the climate change or be preferred by the breeders to ensure the harvestability  
382 of seeds (53). However, the intervals between flowering and maturity tended to become  
383 longer which may contribute to the production enhancement(54). In summary, our study not  
384 only shed lights into the evolutionary history of soybean, but also provides valuable genetic

385 resources for future breeding.

## 386 **Materials and Methods**

### 387 **Plant materials and growth conditions**

388 A total of 2,214 soybean accessions including cultivated *G. max* (1,993), annual wild *G. soja*  
389 (218), perennial wild species *G. tomentella* (2) and *G. tabacine* (1), were analyzed in this  
390 study (table S1). Among them, 1,674 genomes were newly sequenced in this study and the  
391 rest 540 have been released before(55, 56). *G. tomentella* and *G. tabacine*, the only two  
392 perennial wild species occurring in China, were included as out-groups for the population  
393 structure analyses. Most (99.5% in 218 accessions) of *G. soja* were selected from its native  
394 range (East Asia), including China (179), Korea (10), Japan (19) and Russia (9), to well  
395 represent the diversity of this species. Among 1993 *G. max* accessions, 1,131 were landraces  
396 mainly selected from Chinese primary and applied core collections to capture as much  
397 diversity of the 23,587 cultivated soybean accessions preserved in the Chinese National  
398 Soybean GeneBank as possible. The rest 862 improved cultivars were collected from 17  
399 countries, mainly from the main soybean producing countries such as United States, China,  
400 Japan and Korea (table S1). Of 218 *G. soja* accessions, 109 were planted in two  
401 experimental fields, Jingzhou city in Hubei province (30.3 °N, 112.2 °E) in 2014, and Beijing  
402 city (40.1 °N, 116.7 °E) in 2015. Experiments were performed using a completely randomized  
403 experimental design with two complete replicates in Jingzhou and three complete replicates in  
404 Beijing. Moreover, 1,498 *G. max* accessions were planted in Nanjing city, Jiangsu province  
405 (32.0 °N, 118.8 °E) in 2018. Flowering time was scored based on the description in Qiu et al.  
406 (2006)(57).

407

### 408 **DNA isolation and genome sequencing**

409 The genomic DNA was extracted with a total amount of 1.5 µg per sample and used as input  
410 material for the DNA sample preparations. Sequencing libraries were generated using  
411 TruseqNano® DNA HT sample preparation Kit (Illumina USA) following manufacturer's  
412 recommendations and index codes were added to attribute sequences to each sample.  
413 Basically, the libraries were prepared following these steps: the genomic DNA sample was  
414 fragmented by sonication to a size of ~350 bp, then DNA fragments were end-polished, A-  
415 tailed, and ligated with the full-length adapters for Illumina sequencing with further PCR  
416 amplification. At last, PCR products were purified (AMPure XP bead system) and libraries  
417 were analyzed for size distribution by Agilent2100 Bioanalyzer and quantified using real-time  
418 PCR. Subsequently, we used the Illumina HiSeq X platform to generate ~10.58 Tb raw  
419 sequences with 150-bp read length. Additionally, 540 were previously released accessions  
420 with 5.94 Tb sequences were download from NCBI database and incorporated to analysis.

421

#### 422 **Sequence quality checking and filtering**

423 To avoid reads with artificial bias, i.e. low-quality paired reads, which primarily result from  
424 base-calling duplicates and adaptor contamination, we removed the following types of reads:  
425 (i) reads with  $\geq 10\%$  unidentified nucleotides (N); (ii) reads with  $> 10$  nt aligned to the adaptor,  
426 with  $\leq 10\%$  mismatches allowed; (iii) reads with  $> 50\%$  bases having phred quality  $< 5$ ; and (iv)  
427 putative PCR duplicates generated through PCR amplification in the library construction  
428 process, i.e. read 1 and read 2 of two paired-end reads that were completely identical.  
429 Consequently, we obtained 16.41 Tb ( $\sim 6.3X$  coverage per individual) of high-quality paired-  
430 end reads, including 96.05% and 90.98% nucleotides with phred quality  $\geq Q20$  (with an  
431 accuracy of 99.0%) and  $\geq Q30$  (with an accuracy of 99.9%), respectively (table S1).

432

#### 433 **Sequence alignment, variation calling, and annotation**

434 After sequence quality filtering, we first mapped the remaining high-quality sequences to the  
435 soybean reference genome(12) (Williams 82 assembly V2.0, [http://](http://www.phytozome.net/soybean)  
436 [www.phytozome.net/soybean](http://www.phytozome.net/soybean)) using BWA software (v. 0.7.17-r1188)(58) with the command  
437 ‘mem -t 10 -k 32 -M’. Second, we converted SAM format to BAM format using the package  
438 SAMtools (v.1.3)(59). Third, we sorted BAM files using the package Sambamba (v.  
439 0.6.8)(60). Finally, the sorted bam file was marked as duplicate using the command  
440 “MarkDuplicates” in the package picard (v. 2.18.15, <http://broadinstitute.github.io/picard>).  
441 Subsequently, we performed individual gVCF calling according to the best practices using the  
442 Genome Analysis Toolkit (GATK, version v4.1.2.0)(61) with the HaplotypeCaller-based  
443 method and then population SNP calling by merging all gVCFs with the commands  
444 “GenomicsDBImport” and “GenotypeGVCFs”. Consequently, a total of 65,374,688 SNPs  
445 (60,153,828 are bi-allelic) and 10,952,749 indels (8,349,613 small insertions and deletions  $<$   
446 15 bp and less than 50% missing) were identified in 2,214 accessions.

447 To obtain credible population SNP sets, we performed a screening process as follows:

448 (a) For filtering SNPs, the hard filter command ‘VariantFiltration’ was applied to exclude  
449 potential false-positive variant calls with the parameter ‘--filterExpression "QD  $< 2.0$  || MQ  $<$   
450 40.0 || FS  $> 60.0$  || SOR  $> 3.0$  || MQRankSum  $< -12.5$  || ReadPosRankSum  $< -8.0$ ".

451 Subsequent filtering was performed after removing three perennial wild accessions.

452 (b) Screening of biallelic variants was performed with a Hardy–Weinberg equilibrium p-  
453 value  $\geq 0.01$ (62).

454 (c) Variants were filtered out when the proportion of samples within the population lacking  
455 the variant was  $> 20\%$  and the minor allele frequency (MAF) was  $< 0.01$ .

456 (d) Variants were filtered out when the inbreeding coefficient was more than 0.348(63). After  
457 those steps, we obtained 8,785,134 high-credible biallelic SNPs,

458 (e) Subsequently, we also subsampled 1,721,062 SNPs set using a two-step linkage  
459 disequilibrium (LD) pruning procedure with PLINK (v1.9) in which SNPs were removed with  
460 a window size of 10 kb, window step of one SNP and  $r^2$  threshold of 0.8, followed by another  
461 round of LD pruning with a window size of 50 SNPs, window step of one SNP and  $r^2$   
462 threshold of 0.8. Thus, these 1,721,062 SNPs is used for subsequent population structure  
463 analyses in soybeans.

464 (f) We added genotypes of three perennial accessions to the filtered SNP set of 2211  
465 accessions. The integrated SNP data set was used to infer population structure of 2214  
466 accessions.

467

#### 468 **Annotation of genomic variants**

469 Genomic variant annotation was performed according to the soybean genome using the  
470 package ANNOVAR (version: 2019-10-24)(64). Based on the genome annotation, genomic  
471 variants were categorized as being in exonic regions, UTR regions (represent the 5' and 3'  
472 untranslated sequences), intronic regions, splice sites (within 2 bp of a splicing junction),  
473 upstream and downstream regions (within a 2-kb region upstream or downstream from the  
474 transcription start site), and intergenic regions. The functional consequences of the variants in  
475 coding regions were further grouped into synonymous, missense, stop-gain, stop-loss.

476

#### 477 **Population diversity statistics**

478 We first screened out windows with more than 10 SNPs. Subsequently, nucleotide diversity  
479 ( $\theta\pi$ )(65) was applied to estimate the degree of variability within each group and genetic  
480 differentiation ( $F_{ST}$ )(66) were applied to explain population differentiation on the basis of the  
481 variance of allele frequencies between two different groups by VCFtools (v0.1.14)(67).

482

#### 483 **Linkage disequilibrium (LD) analysis**

484 To estimate and compare the pattern of LD for different groups, the squared correlation  
485 coefficient ( $r^2$ ) between pairwise SNPs was computed using the software PLINK (v1.9)(68).  
486 Regarding the LD for overall genome, the  $r^2$  value was calculated for individual  
487 chromosomes using SNPs from the corresponding chromosome with parameter '-ld-window-  
488 r2 0 -ld-window 99999 -ld-window-kb 1000', and then the pairwise  $r^2$  values were averaged  
489 across the whole genome.

490

#### 491 **Population structure analysis**

492 To investigate the genetic relationships between 2214 soybeans, we constructed a  
493 phylogenetic tree using the neighbor-joining (NJ) tree with 100 bootstrap iterations based on  
494 the 1,721,062 SNPs using the TreeBest program (version: 1.92)



495 (<https://github.com/Ensembl/treebest>). The population genetic structure was examined via an  
496 expectation maximization algorithm, as implemented in the program ADMIXTURE  
497 (v1.23)(69), through the preset the number of assumed genetic clusters  $K$  with 10,000  
498 iterations for each run. We also conducted PCA to evaluate genetic structure using GCTA  
499 software (v1.24.2)(70). We also build the maximum likelihood tree for soybean populations  
500 based on 1,721,062 SNPs set using Perennial population as outgroup applying software  
501 TreeMix(18).

502

### 503 **Genome-wide selective sweep scanning**

504 Based on 8,785,134 high-credible biallelic SNPs, several statistical methods were employed  
505 to identify genome-wide selection signals. Firstly, by comparing the pairwise  $F_{ST}$ (66) between  
506 designed compared patterns with a sliding window (10-kb windows sliding in 5-kb steps), we  
507 employed Population Branch Statistic (PBS) approach(71) to detect incomplete selective  
508 sweeps over short divergence times. Our approach designed to take advantage of outgroup  
509 and used to identify selection targeted on the tested lineage. The PBS was calculated as  
510 follows:

$$511 \quad (T^{TP-CP} + T^{TP-CO} - T^{CP-CO}) / 2$$

512 Where  $T$  represents the population divergence time in units scaled by the population size,  
513 which is the negative log transformed  $(1 - F_{ST})$  between two populations. TP represents the  
514 targeted population; CP indicates the control population; and CO implies the outgroup. We  
515 considered the window as the candidate selected regions when PBS value of the comparative  
516 sliding windows at a significance of  $P < 0.01$  ( $Z$ -test).

517 Specifically, for comparative pattern of W\_CR vs L\_CR in Fig. 3b, the design formulas  
518 is  $(T^{L\_CR-W\_CR} + T^{L\_CR-W\_SR} - T^{W\_CR-W\_SR}) / 2$ ; for the pattern of W\_SR vs W\_CR in  
519 Supplementary Fig. 25, the formula is  $(T^{W\_CR-W\_SR} + T^{W\_CR-W\_NR} - T^{W\_SR-W\_NR}) / 2$ ; for the  
520 pattern of W\_SR vs W\_NR in Supplementary Fig. 26, the formula is  $(T^{W\_NR-W\_SR} + T^{W\_NR-}$   
521  $W\_CR - T^{W\_SR-W\_CR}) / 2$ ; for the pattern of L\_CR vs L\_NR in Supplementary Fig. 27, the  
522 formula is  $(T^{L\_NR-L\_CR} + T^{L\_NR-W\_CR} - T^{L\_CR-W\_CR}) / 2$ ; for the pattern of L\_CR vs L\_SR in  
523 Supplementary Fig. 28, the formula is  $(T^{L\_SR-L\_CR} + T^{L\_SR-W\_CR} - T^{L\_CR-W\_CR}) / 2$ ; for the  
524 pattern of L\_CR vs I\_CR in Supplementary Fig. 29, the formula is  $(T^{L\_CR-L\_CR} + T^{L\_CR-W\_CR} - T$   
525  $L\_CR-W\_CR) / 2$ ; for the pattern of L\_SR vs I\_SR in Supplementary Fig. 30, the formula is  $(T$   
526  $L\_SR-L\_SR + T^{L\_SR-W\_SR} - T^{L\_SR-W\_SR}) / 2$ ; for the pattern of L\_NR vs I\_NR in Supplementary Fig.  
527 31, the formula is  $(T^{L\_NR-L\_NR} + T^{L\_NR-W\_NR} - T^{L\_NR-W\_NR}) / 2$ .

528 Second,  $\theta\pi$ (65) were calculated based on a sliding window (10-kb windows sliding in 5-  
529 kb steps) in two populations, A and B. The statistic  $\log_2(\theta\pi_A / \theta\pi_B)$  was then calculated with  
530 respect to A and B populations. An unusually negative value (1% outliers) suggests selection  
531 in population A, and the top positive value (1% outliers) indicates selection in population B.

532 Third, the test of cross-population composite likelihood ratio (XP-CLR;  
533 <https://github.com/hardingnj/xpclr>)(72) was performed with the following parameters: sliding  
534 window size, 0.01 cM; grid size, 10 k; maximum number of SNPs within a window, 100; and  
535 correlation value for two SNPs weighted with a cutoff of 0.95. The genetic distance was  
536 calculated based on a published genetic map(73). The windows with top 1% XP-CLR score  
537 were taken as outliers.

538 The genetic diversity  $\pi$  is a classic statistic to detect signals of selection (especially hard  
539 sweeps) by assuming that selected regions showed a reduced genetic diversity. PBS method  
540 can be viewed as a model-based extension of  $F_{ST}$ , which was very powerful in detecting  
541 incomplete selective sweeps over short divergence times(22); while the XP-CLR method is  
542 able to detect ancient selective events(24). Thus, the three methods are compatible and  
543 complementary. As the three methods are good at detecting different selective events, we  
544 observed a low overlap of selected molecular markers(25, 26, 74, 75). Therefore, we took the  
545 candidates with support from at least one statistic. Subsequently, all candidate regions were  
546 assigned to corresponding SNPs and genes.

547

#### 548 **Population directional mutation analysis**

549 We examined the directional increase or decrease of allele frequencies though integrating  
550 putative intact evolutionary routes of soybeans incorporated with expansion, domestication  
551 and improvement in three regions. First, we identified the major genotypes of the southern  
552 wild soybean population and used it as a reference genotype. Then, the allele frequencies for  
553 SNPs were calculated for each population and then we calculated average allele frequencies  
554 within a sliding window (10-kb windows sliding in 5-kb steps). Subsequently, we  
555 characterized the changed trend of windows allele frequencies in different evolutionary stages.  
556 Finally, we screened out candidate windows which exhibited the consecutive dynamic change  
557 of allele frequencies.

558

#### 559 **Demographic history analyses**

560 We inferred the fluctuation of the effective population size for three inferred sub-populations  
561 of cultivated soybeans (C\_CR, C\_NR and C\_SR) with SMC++ (v1.15.2)(76) based with a  
562 constant generation time of 1 years and the per-generation mutation rate as  $6.1 \times 10^{-9}$  (77).

563 In order to test the introgression between the wild and cultivated soybeans, the  $f_d$  statistic(78)  
564 was computed based on a tree form (((P1, P2), P3), O), where P1 was fixed as the American  
565 cultivated lines and the three perennial wild species as the outgroup (O). P2 was set to each of  
566 the three geographical populations in landraces and P3 was defined to each of the three  
567 geographical populations in wild soybeans. The  $f_d$  statistic was computed in 10-kb non-  
568 overlapping windows with the python script ABBABABAwindows.py

569 (<https://github.com/simonhmartin/genomics> general). The windows with the 95% top  $f_d$  values  
570 were regarded as outliers.

571

### 572 **Genome-wide association study**

573 Association tests were performed with a multi loci model, FarmCPU (v 1.02)(79), which  
574 iteratively utilized fixed effect model and random effect model. The top three columns of  
575 principal components, phenotypes and pseudo QTNs (Quantitative Trait Nucleotides) were  
576 added as covariates in the fixed effect model for association tests and the model can be  
577 written as:

$$578 \quad Y = Pbp + Mtbt + Sjdj + e$$

579 where  $Y$  is phenotypic observation vector;  $P$  is a matrix of fixed effects, including the top  
580 three principal components of all phenotypes;  $M_t$  is the genotype matrix of  $t$  pseudo QTNs  
581 that used as fixed effects;  $bp$  and  $bt$  are the relevant design matrices for  $P$  and  $M_t$ , respectively;  
582  $S_j$  is the  $i$ th marker to be tested and  $d_j$  is the corresponding effect;  $e$  is the residual effect  
583 vector and  $e \sim N(0, I\sigma^2e)$ . Random effect model is used for selecting the most appropriate  
584 pseudo QTNs. The model is written as:

$$585 \quad y = u + e$$

586 where  $y$  and  $e$  stay the same as in fixed effect model;  $u$  is the genetic effect and  $u \sim N(0,$   
587  $K\sigma^2u)$ , in which  $K$  is the relationship matrix that defined by pseudo QTNs. In order to detect  
588 the significant SNPs, we used the Bonferroni correction threshold for multiple tests, defined  
589 as  $\alpha/K$  ( $\alpha = 0.05$  and  $K$  is the number of SNPs).

590

### 591 **Functional verification of candidate genes**

592 To generate the CRISPR/Cas9-engineered mutants, gRNAs were designed using CRISPR  
593 direct website (<http://crispr.dbcls.jp/>)(80). Multiple target gRNAs were selected for each gene  
594 to construct the CRISPR/Cas9 vector according to the protocol reported previously(55). The  
595 editing efficiency of each construct was evaluated by soybean hairy root system(81), and at  
596 least two vectors with high editing efficiency for each gene were selected for soybean  
597 transformation. The above-mentioned CRISPR/Cas9 vectors were individually introduced  
598 into *Agrobacterium tumefaciens* strain EHA105 via electroporation and then transformed into  
599 an elite soybean cultivar Tianlong 1 (TL1) using the cotyledon-node method(82). For  
600 phenotypic analysis, plants were grown under long days conditions (16 h light/ 8 h dark,  
601 26°C), and short days conditions (12 h light/ 12 h dark, 26°C) in phytotrons. The *GmSPA3c-*  
602 *Hap12* CDS and the 2064 bp native promoter were obtained from Williams82 by PCR  
603 amplification. The 2064 bp native promoter and CDS fragment were amplified by overlapping  
604 PCR to obtain one fragment and then introduced into the pTF101-GFP vector replacing the  
605 *d35S* promoter-gene fragment. This new complementary construct (*GmSPA3c-Hap12-GFP*) was

606 introduced into *Agrobacterium* strain EHA105, and *Agrobacterium*-mediated transformation  
607 of the TL1 carrying Hap11 of *GmSPA3c* was performed as described previously(55). All the  
608 primers used for vector construction are listed in Supplementary table 8.

609

### 610 **Gene expression analysis**

611 To compare the dynamic transcriptional levels of indicated genes in the wild type, *Gmspa3c*  
612 mutant lines and complementary lines, the soybean plants were grown under long days or  
613 short days conditions for 20 days. The second fully expanded trifoliolate leaves were  
614 harvested in 4 h intervals during a 24 h period. Total RNA was extracted using TRIzol  
615 Reagent (TIANGEN) and cDNA was synthesized from DNase-treated total RNA (3 µg,  
616 reaction total volume 20 ul) using a reverse transcription kit (TransGen Biotech). qRT-PCR  
617 was performed in 384-well optical plates using a SYBR Green RT-PCR kit (Vazyme) with an  
618 ABI Q7 equipment. All primers used for indicated genes were listed in Supplementary table 8.  
619 Three independent biological replicates were performed, and three replicate reactions were  
620 employed for each sample.

621

### 622 **RICE System to Investigate Gene Expression**

623 The *d35s* droved *GmSPA3c* (Hap11 and Hap12) plasmids were introduced into *A. tumefaciens*  
624 strain K599, which was used to infect young seedlings of Tianlong1 at the hypocotyl region to  
625 induce transgenic hairy roots according to a previously reported method (83). RICE System  
626 performed as described previously(55). The transgenic roots were grown on the callus  
627 induction medium for 2 weeks under long-day conditions. Those independent transgenic  
628 callus lines confirmed by qRT-PCR were transferred to fresh callus induction medium for  
629 subculturing. Correlation analysis between *GmSPA3c* (Hap11 and Hap12) and *GmFT2a/5a*  
630 mRNA levels in calluses transformed with 35s droved *GmSPA3c* (Hap11 and Hap12) at ZT4 in  
631 long-day conditions.

632

### 633 **Accession numbers**

634 Gene Sequences were downloaded from the *Glycine max* Wm82.a2.v1 (Soybean) database  
635 (<https://phytozome.jgi.doe.gov/pz/portal.html>). The accession numbers are *GmSPA3c*  
636 (*Glyma.06G242100*), *GmFT2a* (*Glyma.16G150700*), *GmFT5a* (*Glyma.16G044100*) , *E1*  
637 (*Glyma.06G207800*), *GmFT4* (*Glyma.08G363100*) and *GmActin* (*Glyma.18G290800*).

638

### 639 **References**

- 640 1. B. Gaut, D. Seymour, Q. Liu, Y. Zhou, Demography and its effects on genomic variation in  
641 crop domestication. *Nat Plant* **4**, 512-520 (2018).

- 642 2. Y. Liu *et al.*, Pan-genome of wild and cultivated soybeans. *Cell* **182**, 162-176 (2020).
- 643 3. T. E. Carter, R. Nelson, C. H. Sneller, Z. Cui, *Soybeans: Improvement, Production and Uses*  
644 *3rd edn.* (Madison, Wisconsin, USA, 2004).
- 645 4. Z. Zhou *et al.*, Resequencing 302 wild and cultivated accessions identifies genes related to  
646 domestication and improvement in soybean. *Nat Biotechnol* **33**, 408-414 (2015).
- 647 5. H. M. Lam *et al.*, Resequencing of 31 wild and cultivated soybean genomes identifies patterns  
648 of genetic diversity and selection. *Nat Genet* **42**, 1053-1059 (2010).
- 649 6. Y. H. Li *et al.*, Molecular footprints of domestication and improvement in soybean revealed by  
650 whole genome re-sequencing. *BMC Genomics* **14**, 579 (2013).
- 651 7. M. Hufford *et al.*, The genomic signature of crop-wild introgression in maize. *PLoS Genet* **9**,  
652 e1003477 (2013).
- 653 8. E. S. Mace *et al.*, Whole-genome sequencing reveals untapped genetic potential in Africa's  
654 indigenous cereal crop sorghum. *Nat Commun* **4**, 2320 (2013).
- 655 9. C. Li *et al.*, A domestication-associated gene *GmPRR3b* regulates the circadian clock and  
656 flowering time in soybean. *Mol Plant* **13**, 745-759 (2020).
- 657 10. Y. Guo, Y. Li, H. Hong, L. Qiu, Establishment of the integrated applied core collection and its  
658 comparison with mini core collection in soybean (*Glycine max*). *Crop J* **2**, 38-45 (2014).
- 659 11. L. Wang *et al.*, Establishment of Chinese soybean *Glycine max* core collections with  
660 agronomic traits and SSR markers. *Euphytica* **151**, 215-223 (2006).
- 661 12. J. Schmutz *et al.*, Genome sequence of the palaeopolyploid soybean. *Nature* **463**, 178-183  
662 (2010).
- 663 13. W. Wang *et al.*, Genomic variation in 3,010 diverse accessions of Asian cultivated rice. *Nature*  
664 **557**, 43-49 (2018).
- 665 14. J. Yang, S. H. Lee, M. E. Goddard, P. M. Visscher, GCTA: a tool for genome-wide complex  
666 trait analysis. *Am J Hum Genet* **88**, 76-82 (2011).
- 667 15. D. H. Alexander, J. Novembre, K. Lange, Fast model-based estimation of ancestry in unrelated  
668 individuals. *Genome Res* **19**, 1655-1664 (2009).
- 669 16. H. Chen *et al.*, Arabidopsis CULLIN4-damaged DNA binding protein 1 interacts with  
670 constitutively photomorphogenic1-suppressor of phyA complexes to regulate  
671 photomorphogenesis and flowering time. *The Plant cell* **22**, 108-123 (2010).
- 672 17. X. Huang *et al.*, A map of rice genome variation reveals the origin of cultivated rice. *Nature*  
673 **490**, 497 (2012).
- 674 18. J. K. Pickrell, J. K. Pritchard, Inference of population splits and mixtures from genome-wide  
675 allele frequency data. *PLoS Genet* **8**, e1002967 (2012).
- 676 19. J. Guo *et al.*, Population structure of the wild soybean (*Glycine soja*) in China: implications  
677 from microsatellite analyses. *Ann Bot-London* **110**, 777-785 (2012).
- 678 20. M. Wang, Y. Zhao, B. Zhang, Efficient test and visualization of multi-set intersections. *Sci Rep*  
679 **5**, 16923 (2015).
- 680 21. M. Nei, W. Li, Mathematical model for studying genetic variation in terms of restriction  
681 endonucleases. *P Natl Acad Sci USA* **76**, 5269-5273 (1979).
- 682 22. Yi X *et al.*, Sequencing of 50 human exomes reveals adaptation to high altitude. *Science* **329**,  
683 75-78 (2010).
- 684 23. B. S. Weir, C. C. Cockerham, Estimating F-statistics for the analysis of population structure.

- 685           *Evolution* **38**, 1358-1370 (1984).
- 686   24.   H. Chen, N. Patterson, D. Reich, Population differentiation as a test for selective sweeps.  
687           *Genome Res* **20**, 393-402 (2010).
- 688   25.   J. M. Akey, Constructing genomic maps of positive selection in humans: where do we go from  
689           here? *Genome Res* **19**, 711–722 (2009).
- 690   26.   P. C. Sabeti *et al.*, Positive natural selection in the human lineage. *Science* **312**, 1614–1620  
691           (2006).
- 692   27.   S. Watanabe *et al.*, A map-based cloning strategy employing a residual heterozygous line  
693           reveals that the *GIGANTEA* gene is involved in soybean maturity and flowering. *Genetics* **188**,  
694           395-407 (2011).
- 695   28.   L. Sun *et al.*, *GmHs1-1*, encoding a calcineurin-like protein, controls hard-seededness in  
696           soybean. *Nat Genet* **47**, 939 (2015).
- 697   29.   D. Zhang *et al.*, Elevation of soybean seed oil content through selection for seed coat shininess.  
698           *Nat Plants* **4**, 30-35 (2018).
- 699   30.   M. Wang *et al.*, Parallel selection on a dormancy gene during domestication of crops from  
700           multiple families. *Nat Genet* **50**, 1435-1441 (2018).
- 701   31.   J. Elzinga *et al.*, Time after time: flowering phenology and biotic interactions. *Trends Ecol*  
702           *Evol* **22**, 432–439 (2007).
- 703   32.   J. Weller, R. Ortega, Genetic control of flowering time in legumes. *Front Plant Sci* **6**, 207  
704           (2015).
- 705   33.   S. Lu *et al.*, Stepwise selection on homeologous *PRR* genes controlling flowering and maturity  
706           during soybean domestication. *Nat Genet* **52**, 428-436 (2020).
- 707   34.   Y. Cai *et al.*, Mutagenesis of *GmFT2a* and *GmFT5a* mediated by CRISPR/Cas9 contributes  
708           for expanding the regional adaptability of soybean. *Plant Biotechnol J* **18**, 298-309 (2020).
- 709   35.   Z. Xia *et al.*, Positional cloning and characterization reveal the molecular basis for soybean  
710           maturity locus *E1* that regulates photoperiodic flowering. *P Natl Acad Sci USA* **109**, E2155-  
711           E2164 (2012).
- 712   36.   S. Lu *et al.*, Natural variation at the soybean *J* locus improves adaptation to the tropics and  
713           enhances yield. *Nat Genet* **49**, 773-781 (2017).
- 714   37.   B. Liu *et al.*, Genetic redundancy in soybean photoresponses associated with duplication of  
715           the *Phytochrome A* gene. *Genetics* **180**, 995-1007 (2008).
- 716   38.   S. Watanabe *et al.*, Map-based cloning of the gene associated with the soybean maturity locus  
717           *E3*. *Genetics* **182**, 1251-1262 (2009).
- 718   39.   Y. Cai, L. Chen, Y. Zhang, S. Yuan, W. Hou, Target base editing in soybean using a modified  
719           crispr/cas9 system. *Plant Biotechnol J* **18**, 1996-1998 (2020).
- 720   40.   L. Chen *et al.*, Soybean adaption to high-latitude regions is associated with natural variations  
721           of *GmFT2b*, an ortholog of *FLOWERING LOCUS T*. *Plant, Cell & Environment* **43**, 934-944  
722           (2020).
- 723   41.   W. Liu *et al.*, Functional diversification of Flowering Locus T homologs in soybean: *GmFT1a*  
724           and *GmFT2a/5a* have opposite roles in controlling flowering and maturation. *New Phytol* **217**,  
725           1335-1345 (2018).
- 726   42.   L. Chen *et al.*, Soybean *API* homologs control flowering time and plant height. *J Integr Plant*  
727           *Biol*, (2020).

- 728 43. D. Cao *et al.*, Molecular mechanisms of flowering under long days and stem growth habit in  
729 soybean. *J Exp Bot* **68**, 1873-1884 (2017).
- 730 44. S. Molnar, S. Rai, M. Charette, E. Cober, Simple sequence repeat (SSR) markers linked to *E1*,  
731 *E3*, *E4*, and *E7* maturity genes in soybean. *Genome* **46**, 1024-1036 (2003).
- 732 45. E. Cober, H. Voldeng, Low r:fr light quality delays flowering of *e7e7* soybean lines. *Crop Sci*  
733 **41**, 1823-1826 (2001).
- 734 46. F. L. Han, YL, Study development of perennial *Glycine* on collecting, appraising and using.  
735 *Soybean Sci* **11**, 64-69 (1992).
- 736 47. T. Hymowitz, C. Newell, Taxonomy of the genus *Glycine*, domestication and uses of soybeans.  
737 *Econ Bot* **35**, 272-288 (1981).
- 738 48. M. B. Hufford *et al.*, Comparative population genomics of maize domestication and  
739 improvement. *Nat Genet* **44**, 808-811 (2012).
- 740 49. P. C. Sabeti, Varilly, P., Fry, B., Lohmueller, J., Hostetter, E., Cotsapas, C., Xie, X., Byrne,  
741 E.H., McCarroll, S.A., Gaudet, R., Schaffner, S., Lander, E., The International HapMap,  
742 Consortium, Genome-wide detection and characterization of positive selection in human  
743 populations. *Nature* **449**, 913-918 (2007).
- 744 50. H. Zhang, Liang, Q. , Wang, N. , Wang, Q. , Li, H., Microevolutionary dynamics of chicken  
745 genomes under divergent selection for adiposity. *Isience* **23**, 101193 (2020).
- 746 51. S. Tian, Zhou, X. , Zhang, D. , Ning, C. , Li, D. , Zhao, H., Genomic analyses reveal genetic  
747 adaptations to tropical climates in chickens. *Isience* **23**, 101644 (2020).
- 748 52. B. Zhu, S. Sun, T. Han, C. Wu, Comparison of growth period and its structure traits between  
749 wild and cultivated soybeans in China. *Soybean Sci* **31**, 894-898 (2012).
- 750 53. A. Challinor, A. Koehler, J. Ramirez-Villegas, S. Whitfield, B. Das, Current warming will  
751 reduce yields unless maize breeding and seed systems adapt immediately. *Nat Climate Change*  
752 **6**, 954-958 (2016).
- 753 54. Y. Li *et al.*, The identification of presence/absence variants associated with the apparent  
754 differences of growth period structures between cultivated and wild soybeans. *J Integr Agr* **15**,  
755 262-270 (2016).
- 756 55. C. Li *et al.*, A domestication-associated gene *GmPRR3b* regulates the circadian clock and  
757 flowering time in soybean. *Molecular plant* **13**, p745-759 (2020).
- 758 56. Z. Zhou *et al.*, Resequencing 302 wild and cultivated accessions identifies genes related to  
759 domestication and improvement in soybean. *Nat Biotechnol* **33**, 408-414 (2015).
- 760 57. L. J. Qiu, R. Z. Chang, Z. X. Liu, R. X. Guan, Y. H. Li, *Descriptors and data standard for*  
761 *soybean (Glycine spp.)*. Y. Fu, Ed., (China Agriculture Press, Beijing, 2006).
- 762 58. H. Li, R. Durbin, Fast and accurate short read alignment with Burrows-Wheeler transform.  
763 *Bioinformatics* **25**, 1754-1760 (2009).
- 764 59. H. Li *et al.*, The Sequence Alignment/Map format and SAMtools. *Bioinformatics* **25**, 2078-  
765 2079 (2009).
- 766 60. A. Tarasov, A. J. Vilella, E. Cuppen, I. J. Nijman, P. Prins, Sambamba: fast processing of NGS  
767 alignment formats. *Bioinformatics* **31**, 2032-2034 (2015).
- 768 61. A. McKenna *et al.*, The Genome Analysis Toolkit: a MapReduce framework for analyzing  
769 next-generation DNA sequencing data. *Genome research* **20**, 1297-1303 (2010).
- 770 62. R. Nielsen, J. S. Paul, A. Albrechtsen, Y. S. Song, Genotype and SNP calling from next-  
771 generation sequencing data. *Nat Rev Genet* **12**, 443-451 (2011).

- 772 63. W. Wang *et al.*, Genomic variation in 3,010 diverse accessions of Asian cultivated rice. *Nature*  
773 **557**, 43-49 (2018).
- 774 64. K. Wang, M. Li, H. Hakonarson, ANNOVAR: functional annotation of genetic variants from  
775 high-throughput sequencing data. *Nucleic Acids Res* **38**, e164 (2010).
- 776 65. M. Nei, W. H. Li, Mathematical model for studying genetic variation in terms of restriction  
777 endonucleases. *Proc Natl Acad Sci U S A* **76**, 5269-5273 (1979).
- 778 66. B. S. Weir, C. C. Cockerham, Estimating F-Statistics for the Analysis of Population Structure.  
779 *Evolution* **38**, 1358-1370 (1984).
- 780 67. P. Danecek *et al.*, The variant call format and VCFtools. *Bioinformatics* **27**, 2156-2158 (2011).
- 781 68. S. Purcell *et al.*, PLINK: a tool set for whole-genome association and population-based  
782 linkage analyses. *Am J Hum Genet* **81**, 559-575 (2007).
- 783 69. D. H. Alexander, J. Novembre, K. Lange, Fast model-based estimation of ancestry in unrelated  
784 individuals. *Genome Res* **19**, 1655-1664 (2009).
- 785 70. J. Yang, S. H. Lee, M. E. Goddard, P. M. Visscher, GCTA: a tool for genome-wide complex  
786 trait analysis. *Am J Hum Genet* **88**, 76-82 (2011).
- 787 71. X. Yi *et al.*, Sequencing of 50 human exomes reveals adaptation to high altitude. *Science* **329**,  
788 75-78 (2010).
- 789 72. H. Chen, N. Patterson, D. Reich, Population differentiation as a test for selective sweeps.  
790 *Genome research* **20**, 393-402 (2010).
- 791 73. J. J. Zou *et al.*, Assignment of molecular linkage groups to soybean chromosomes by primary  
792 trisomics. *Theor Appl Genet* **107**, 745-750 (2003).
- 793 74. S. Tian, Zhou, X., Phuntsok, T., Zhao, N., Zhang, D., Ning, C., Li, D., and Zhao, H., Genomic  
794 analyses reveal genetic adaptations to tropical climates in chickens. *iScience* **23**, 101644  
795 (2020).
- 796 75. M. S. Wang *et al.*, Positive selection rather than relaxation of functional constraint drives the  
797 evolution of vision during chicken domestication. *Cell Res* **26**, 556-573 (2016).
- 798 76. J. Terhorst, J. A. Kamm, Y. S. Song, Robust and scalable inference of population history from  
799 hundreds of unphased whole genomes. *Nat Genet* **49**, 303-309 (2017).
- 800 77. B. S. Gaut, Morton, B.R., McCaig, B.M., and Clegg, M.T, Substitution rate comparisons  
801 between grasses and palms: synonymous rate differences at the nuclear gene *Adh* parallel rate  
802 differences at the plastid gene *rbcL*. *Proc Natl Acad Sci U S A* **93**, 10274-10279 (1996).
- 803 78. S. H. Martin, J. W. Davey, C. D. Jiggins, Evaluating the use of ABBA-BABA statistics to  
804 locate introgressed loci. *Mol. Biol. Evol* **2014**, 32 (2014).
- 805 79. X. Liu, M. Huang, B. Fan, E. S. Buckler, Z. Zhang, Iterative usage of fixed and random effect  
806 models for powerful and efficient genome-wide association studies. *PLoS genetics* **12**,  
807 e1005767 (2016).
- 808 80. Y. Naito, K. Hino, H. Bono, K. Ui-Tei, CRISPRdirect: software for designing CRISPR/Cas  
809 guide RNA with reduced off-target sites. *Bioinformatics* **31**, 1120-1123 (2015).
- 810 81. X. Sun *et al.*, Targeted mutagenesis in soybean using the CRISPR-Cas9 system. *Sci Rep* **5**,  
811 10342 (2015).
- 812 82. M. M. Paz, J. C. Martinez, A. B. Kalvig, T. M. Fonger, K. Wang, Improved cotyledonary node  
813 method using an alternative explant derived from mature seed for efficient *Agrobacterium*-  
814 mediated soybean transformation. *Plant Cell Rep* **25**, 206-213 (2006).
- 815 83. A. Kereszt *et al.*, *Agrobacterium rhizogenes*-mediated transformation of soybean to study root



816 biology. *Nature protocols* **2**, 948-952 (2007).

817 84. M. Lynch, J. Conery, The evolutionary fate and consequences of duplicate genes. *Science*  
818 **290**,1151–1155 (2000).

819

## 820 **Acknowledgments**

821 This work was partially supported by the National Key R&D Program of  
822 China(2021YFD1201601, 2016YFD0100201, and 2020YFE0202300), the National Natural  
823 Science Foundation of China (32072091), the Platform of National Crop Germplasm Resources of  
824 China (2016-004, 2017-004, 2018-004, 2019-04 and 2020-05), Crop Germplasm Resources  
825 Protection (2016NWB036-05, 2017NWB036-05, 2018NWB036-05 and 2019NWB036-05), the  
826 Agricultural Science and Technology Innovation Program (ASTIP) of Chinese Academy of  
827 Agricultural Sciences (CAAS-ZDRW202109). We thank the Core Facility Platform, Institute of  
828 Crop Sciences, Chinese Academy of Agriculture Sciences (CAAS), for assistance with sequencing.

## 829 **Author Contributions**

830 Y-H.L., B.L., S.T., and L.Q. conceived the study. Y-H.L., L.W., Y.G, J.R., S.A.J., B.L., S.T.,  
831 and L.Q. jointly wrote the paper. H.H., Y.T., Y.G., Z.L., R.G., Z.Y., L.Z., T.L.G. provided  
832 seeds and DNAs. Y-F.L., G.X., J.W., B.F., X.W., H.Q., W.Z., X.Y.L., D.H., R.C. collected  
833 the phenotype data. X.G., X.J. performed sequencing/SNP calling. Y-H.L., L.W., C.J., D.L.,  
834 Y.H. X.K.L. performed comparative/population/evolutionary/biology analyses. C.Q., H.L.,  
835 T.Z., Y.G., J.L. performed the experiments.

836

## 837 **Competing interests**

838 The authors declare no competing interests.

839

## 840 **Data deposition and accession numbers**

841 All whole genome sequencing data in this study have been deposited in the NCBI Sequence  
842 Read Archive under accession number PRJNA681974.

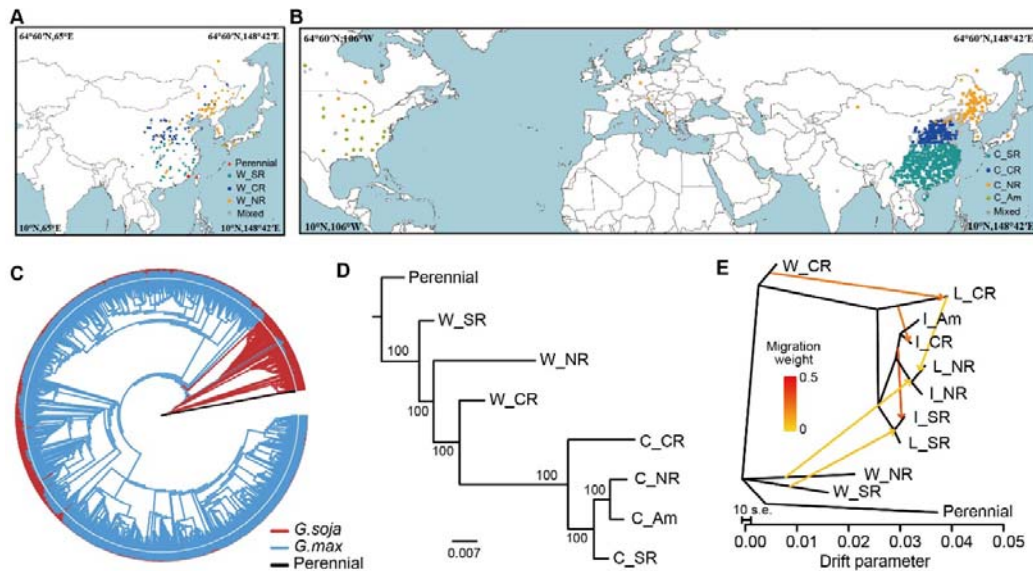

843

844 **Fig. 1 The distribution, genetic diversity and population structure of Subgenus Soja. (A)**

845 Geographic distribution of *G. soja* accessions. **(B)** Geographic distribution of *G. max* accessions.

846 **(C)** Population structure of 1,993 *G. max* and 218 *G. soja* accessions using three perennial

847 accessions as the outgroup. The outer ring indicated the estimated proportions of an individual's

848 assignment at  $K = 2$ . **(D)** Trees for seven subpopulations inferred from population structure

849 analysis with three perennial accessions as the outgroup. The percentage bootstrap support is

850 indicated at each node. **(E)** TreeMix analysis of soybean groups with three perennial accessions as

851 the outgroup and  $m = 6$ . The arrow indicated the migration direction. Abbreviations: "W\_"

852 represented the wild soybean, "C\_" denoted the cultivated soybean, "L\_" represented the

853 landraces and "I\_" denoted the improved cultivars; SR indicated the Chinese Southern region; CR

854 implied the Chinese Central region surrounding the mid-down stream of Yellow River valley; NR

855 stand for the Chinese Northern region plus Japan, Korean peninsula and Russian Far East region.

856

857

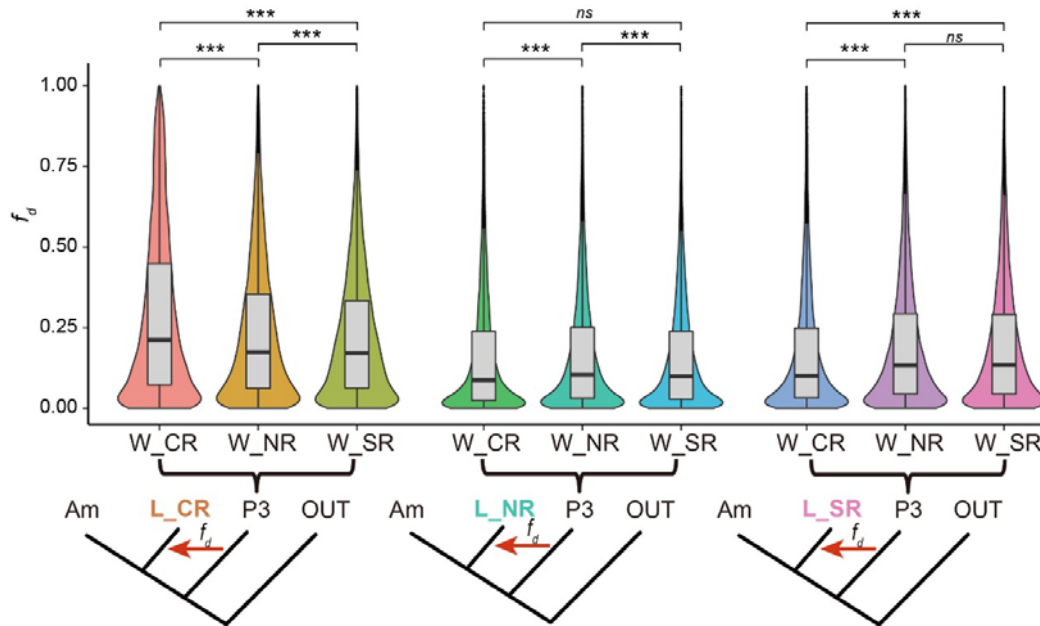

858

859

860

861

862

863

864

865

866

**Fig. 2** The  $f_a$  values were calculated for each landrace sub-population (denoted as the colored population on the tree) with potential introgression from three wild sub-populations, respectively. The abbreviation “W\_” indicates the wild soybean; “L\_” represents the landraces. “ns” means “not significant” ( $p > 0.05$ ). SR indicated the Chinese Southern region; CR implied the Chinese Central region surrounding the mid-down stream of Yellow River valley; NR stood for the Chinese Northern region plus Japan, Korean peninsula and Russian Far East region. “Am” pointed to America.

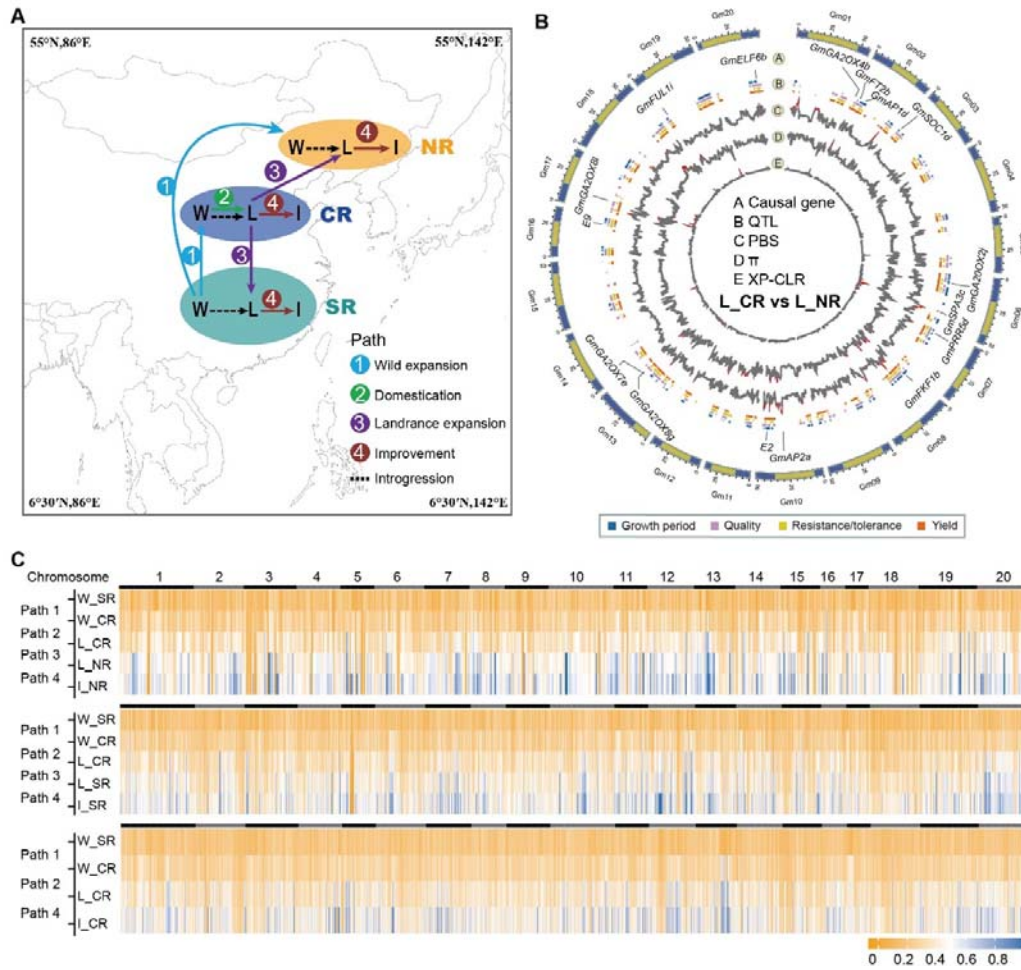

867  
868  
869  
870  
871  
872  
873  
874  
875  
876  
877  
878  
879  
880  
881  
882  
883  
884  
885  
886

**Fig. 3 Detection of genomic regions and genes with selection signals during domestication, expansion, and improvement of soybean.** (A) Four potential evolutionary routes of soybeans. The dashed black lines indicate the gene flow event detected by TreeMix. The numbers on the solid line represent the four routes suggested in the main text. (B) Genome-wide cross-population selection signatures in L\_CR compared with L\_NR on the basis of 8,785,134 informative SNPs. The outermost ring indicated 20 chromosomes. Functional genes with selection signals were marked in ring A, and QTLs associated with growth period, seed quality, yield and resistance/tolerance were shown in ring B with different colors. Rings C to E represented selective signals for PBS,  $\theta\pi$  ratio and XP-CLR, respectively. The genomic region with selection signal (the threshold value was set as Top 1%) were indicated in red. (C) Heat map of allele frequency change across integrating putative intact evolutionary stages in Northern (top), Southern (mid), and Central regions (bottom). Allele frequency of each population represented population mutation frequency by using the major genotypes of the southern wild soybean population as reference. Abbreviations: “W\_” represented the wild soybean, “C\_” denoted the cultivated soybean, “L\_” represented the landraces and “I\_” denoted the improved cultivars; SR indicated the Chinese Southern region; CR implied the Chinese Central region surrounding the mid-down stream of Yellow River valley; NR stand for the Chinese Northern region plus Japan, Korean peninsula and Russian Far East region.

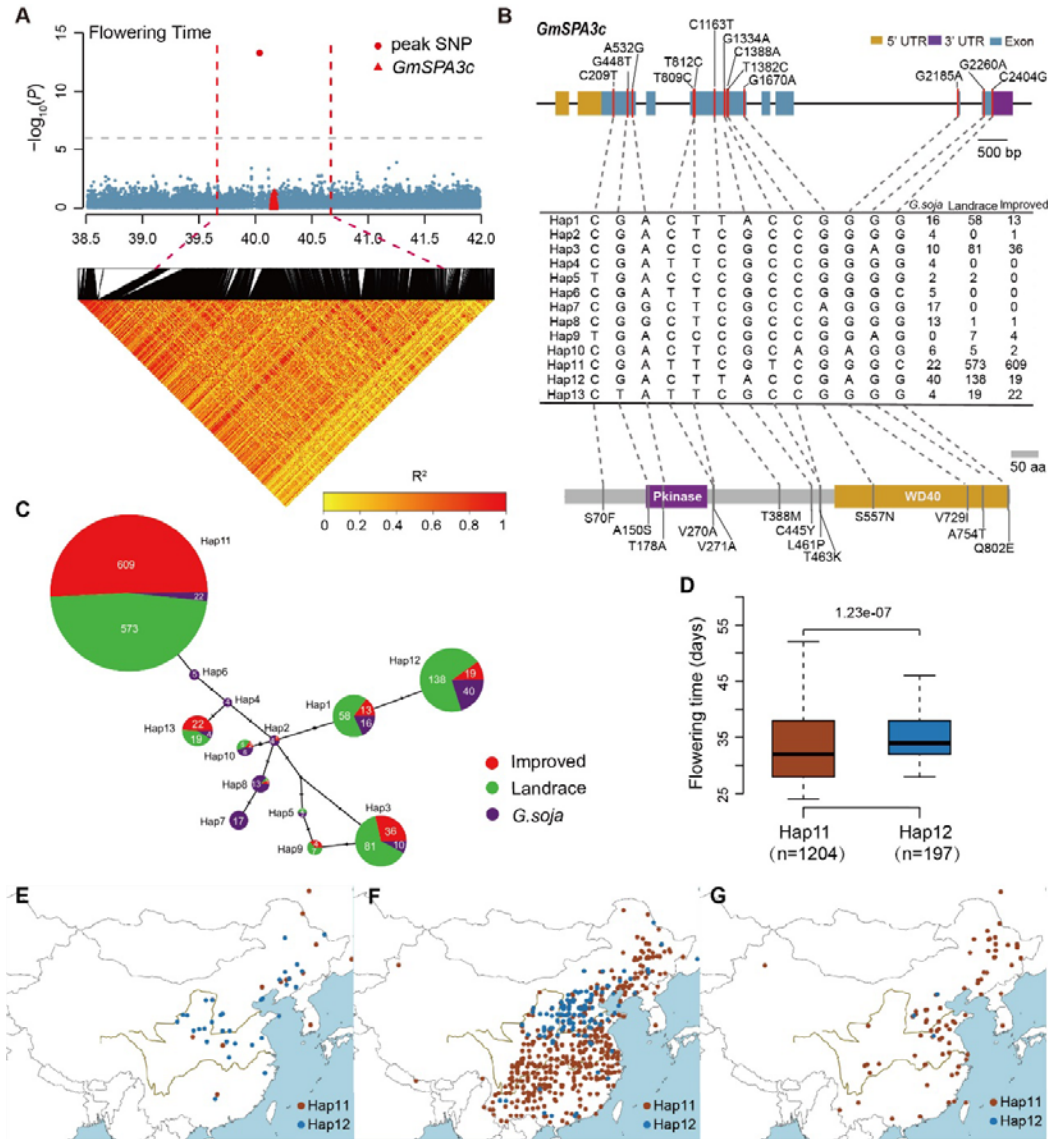

887

888 **Fig. 4 Identification of *GmSPA3c* in regulating flowering time by a genome-wide association**  
 889 **study and characterization of the evolution and geographical distribution of *GmSPA3c***  
 890 **haplotypes. (A)** Manhattan plots for the flowering time measured in the Nanjing station. Dashed  
 891 red lines specified the candidate region surrounding the GWAS hit SNP. Heatmap underneath  
 892 showed the LD block of SNPs in the region. Red triangles indicated the location of *GmSPA3c*. **(B)**  
 893 The gene and protein models, and haplotype diversity of *GmSPA3c*. The gene model in the top  
 894 panel demonstrated the UTRs (black rectangles), CDS regions (teal rectangles), and introns  
 895 (horizontal solid black lines). The vertical solid lines represented the SNP loci in all the soybean  
 896 samples. The protein model in the bottom panel demonstrated the structure of *GmSPA3c*  
 897 containing the Pkinase and WD40 domains. The vertical solid lines represented the corresponding  
 898 change of amino acid. **(C)** Median-joining network of thirteen *GmSPA3c* haplotypes. The pie  
 899 charts in different colored were for *G. soja*, landraces, and improved cultivars, respectively. The  
 900 different colored portions in each pie chart represented the number of accessions of different  
 901 haplotypes. **(D)** Boxplot of the flowering time (days) of the indicated haplotype groups in the

902 Nanjing station. The significant different levels (one-way ANOVA analysis) were showed above  
 903 the bars. (E-G) The geographical distribution of 1,993 soybean accessions carrying different  
 904 haplotypes in *G. soja* (E), landraces (F) and improved cultivars (G), respectively.

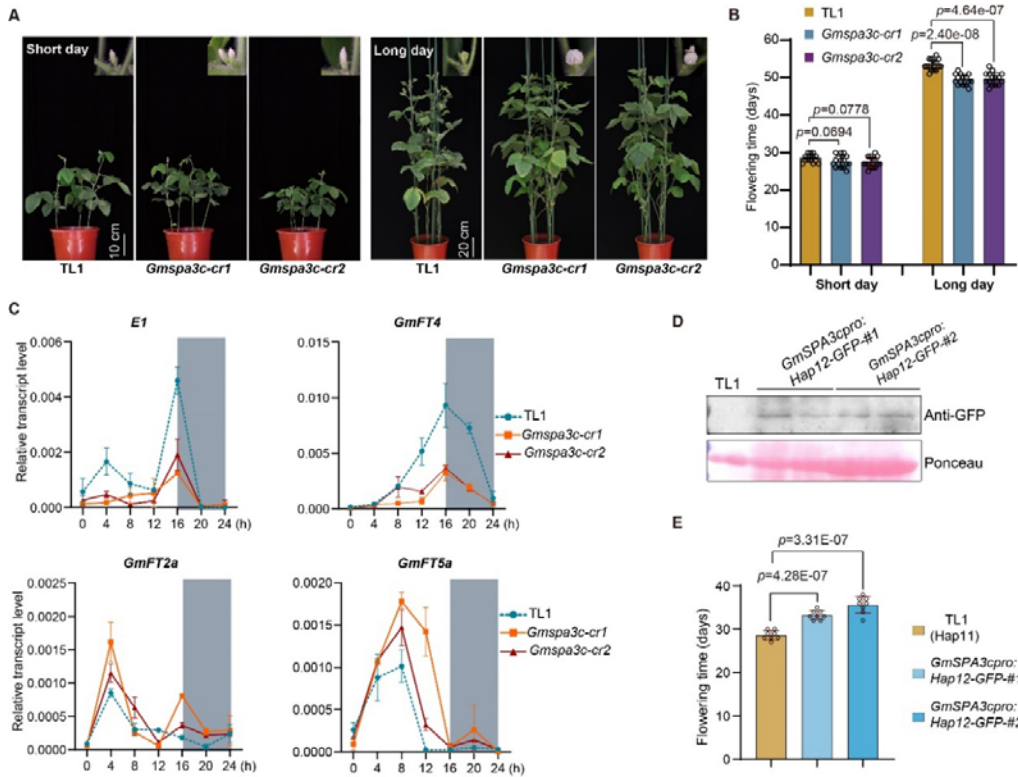

905  
 906 **Fig. 5 Confirmation of *GmSPA3c* as a flowering repressor and comparing the activities of**  
 907 **Hap11 and Hap12 to regulate flowering time.**

908 (A) The representative images of the *GmSPA3c* mutants and wild type TL1 grown under short day (12 h  
 909 Light / 12 h Dark) and long day (16 h Light / 8 h Dark) conditions for 28 and 50 days post seed  
 910 germination, respectively. (B) Bar plot showing the flowering time of the *GmSPA3c* mutants and TL1 as  
 911 in (a). Mean values  $\pm$  s.d. are shown. The significant differences were determined by Student's t-tests  
 912 ( $n > 10$ ). (C) The dynamic transcriptional level of *E1*, *GmFT4*, *GmFT2a*, *GmFT5a* in the *GmSPA3c*  
 913 mutants and TL1 under long day conditions. Mean values  $\pm$  s.d. ( $n = 3$ ) are shown. (D) Immunoblots  
 914 show the abundance of *GmSPA3c*-Hap12-GFP fusion proteins in the *GmSPA3cpro*:*GmSPA3c*-Hap12-  
 915 GFP transgenic plants using anti-GFP antibody. The TL1 sample was used as the negative control. The  
 916 proteins recognized by ponceau were used as the loading control. (E) Comparison of the flowering time  
 917 between TL1 and the *GmSPA3cpro*:*Hap12-GFP* transgenic lines (Student's t-tests;  $n=8$ ). Two  
 918 independent transgenic lines were generated by genetic transformation of the *GmSPA3c*-*Hap12* CDS  
 919 driven by its 2064 bp native promoter into TL1.
